# Supplementary material
Source: ML conference proceedings conference paper supplement (https://aclanthology.org/D19-1453)

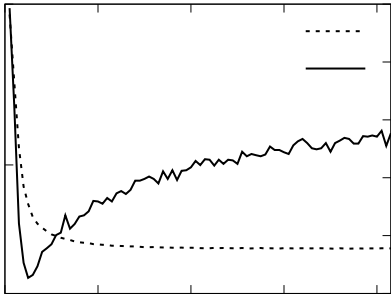

Supplement: Attachment [file D19-1453.Attachment.zip]
